# Supplementary material
Source: PubMed Central journal article supplement (PMC5093036)

**A**

miR-10b UACCCUGUAGAA**A**CCGAAUUUGUG  
 miR-10a UACCCUGUAGAU**U**CCGAAUUUGUG

**B**

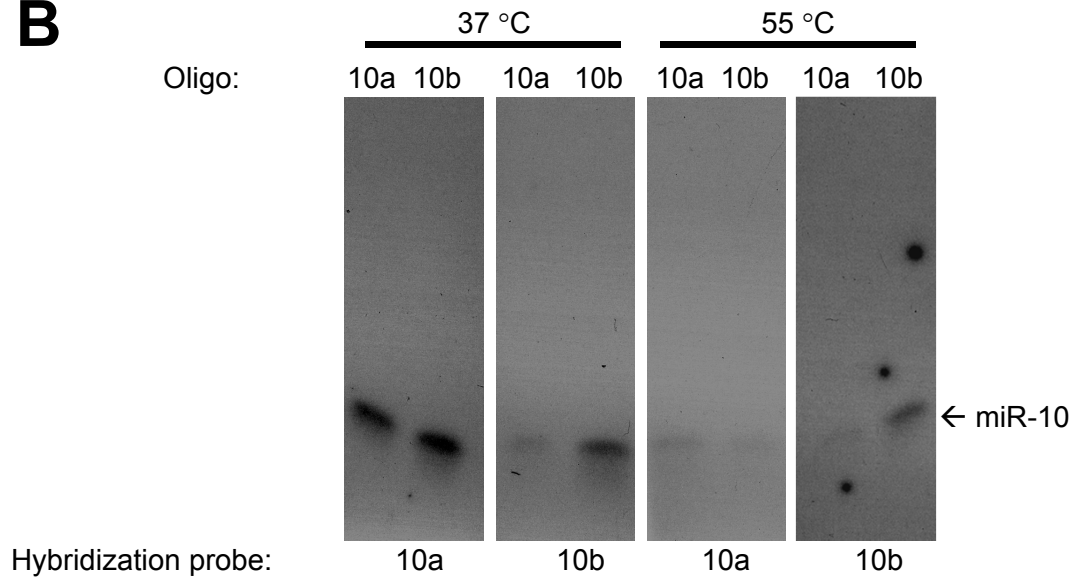

**C**

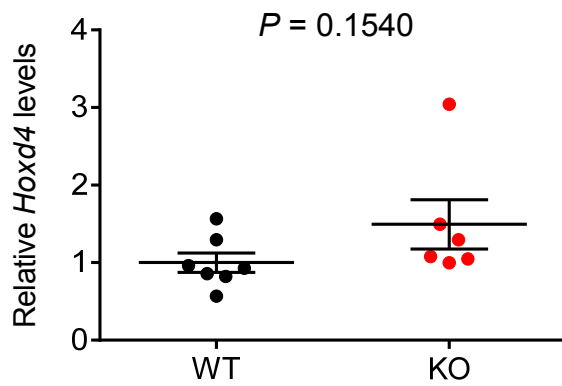

**D**

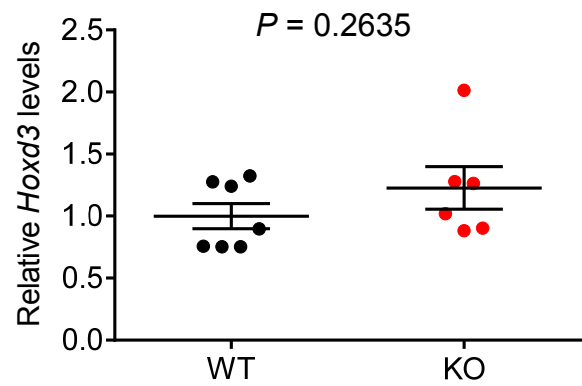

**A**

| miR-10b genotype | # of offsprings | % Observed | % Expected |
|------------------|-----------------|------------|------------|
| Wild-type        | 88              | 25.4       | 25         |
| Heterozygous     | 177             | 51.2       | 50         |
| Knockout         | 81              | 23.4       | 25         |
| Total            | 346             | 100        | 100        |

$\chi^2 = 0.468$   
 $P = 0.791$

**B**

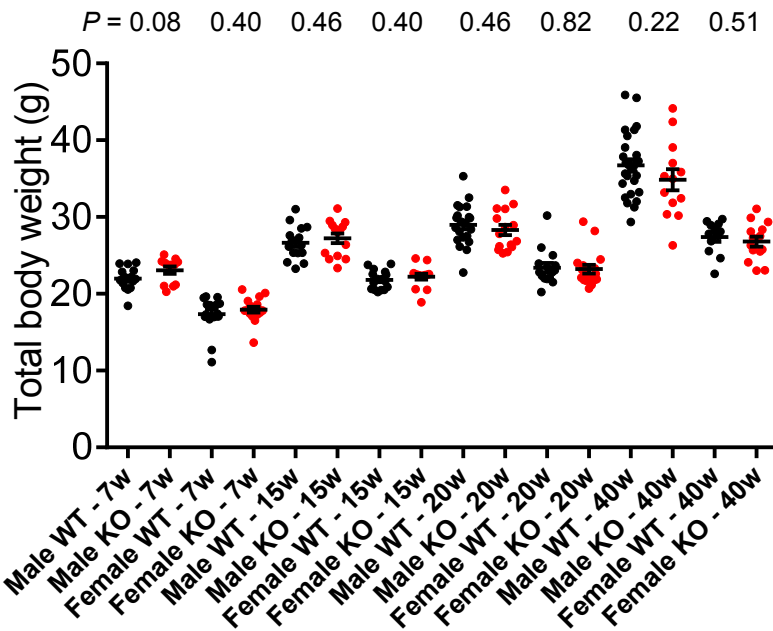

**C**

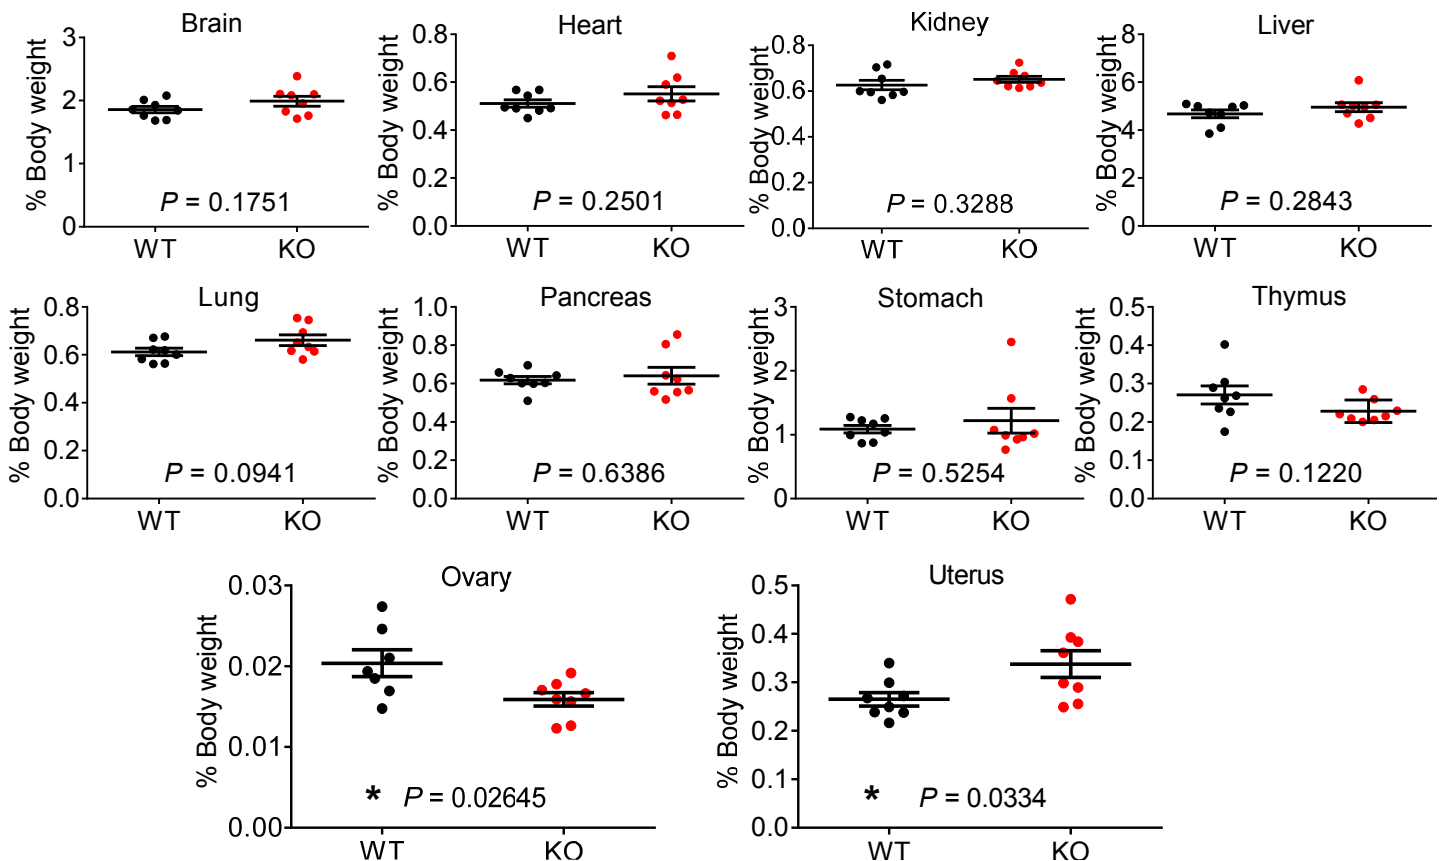



# Supplementary Figure S4

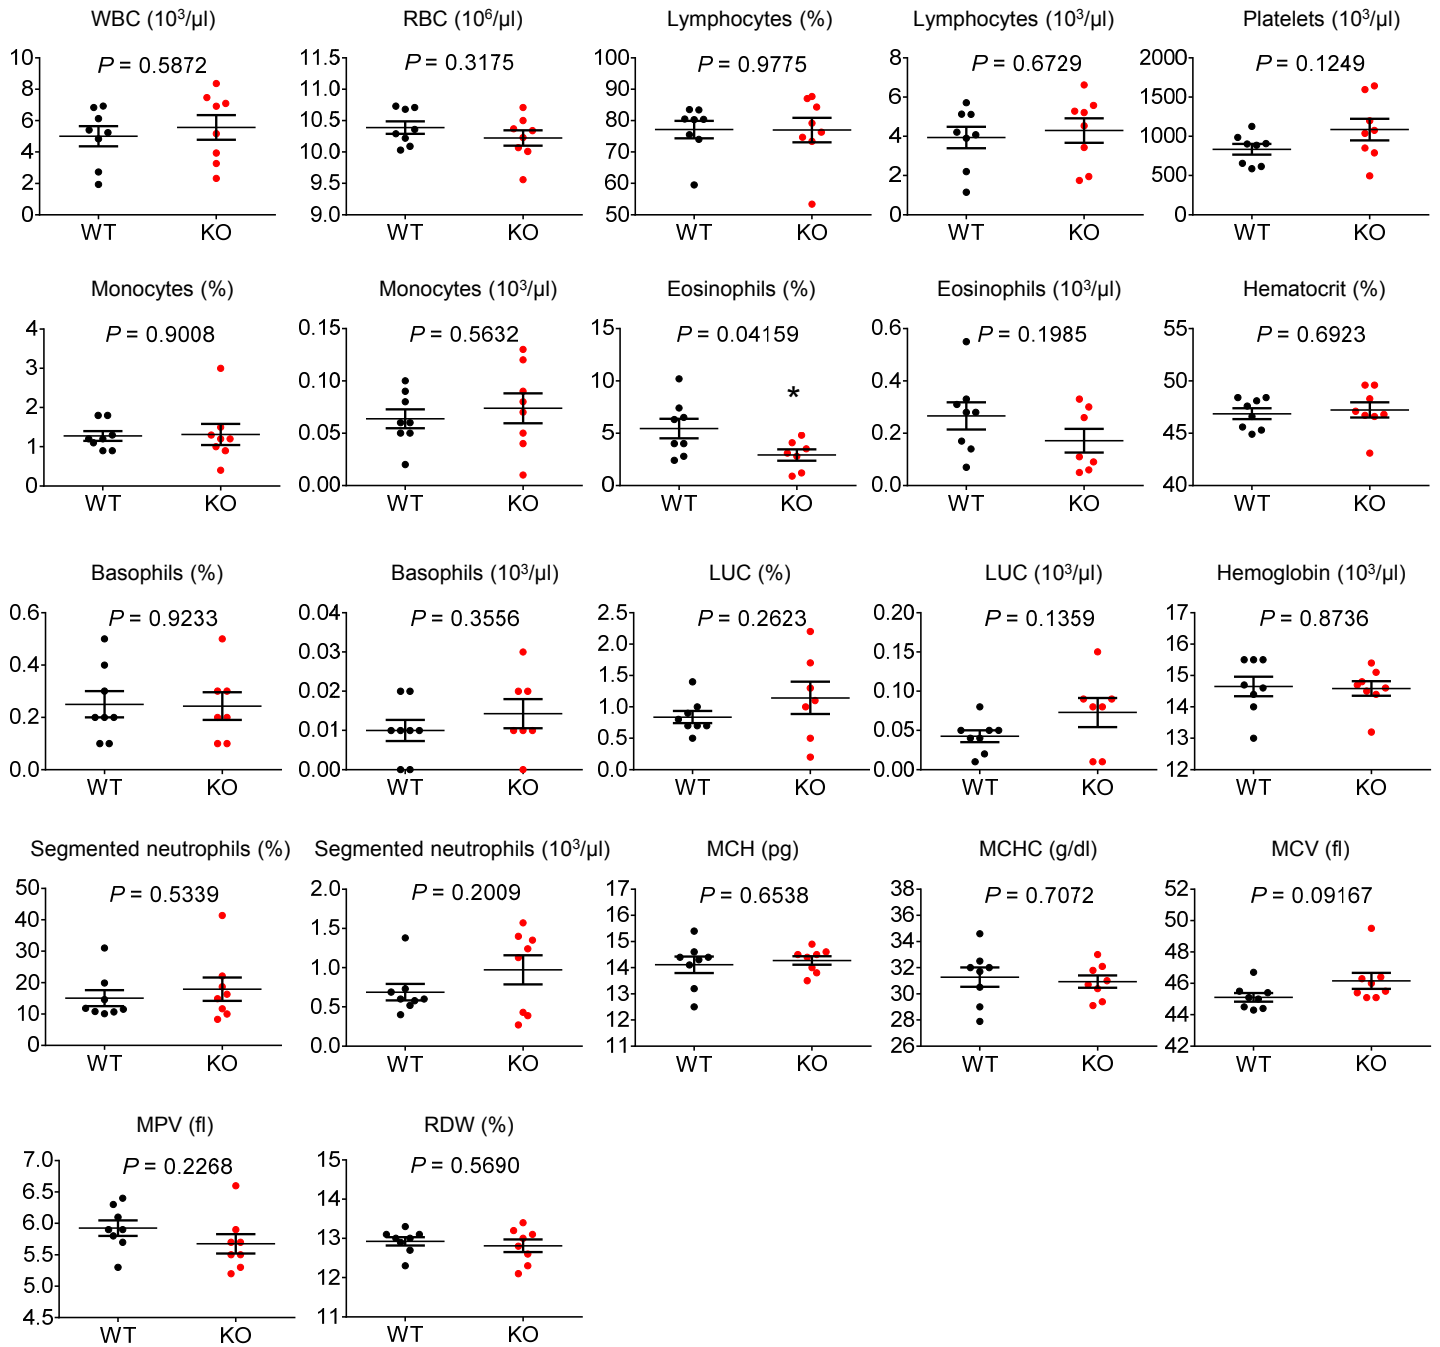

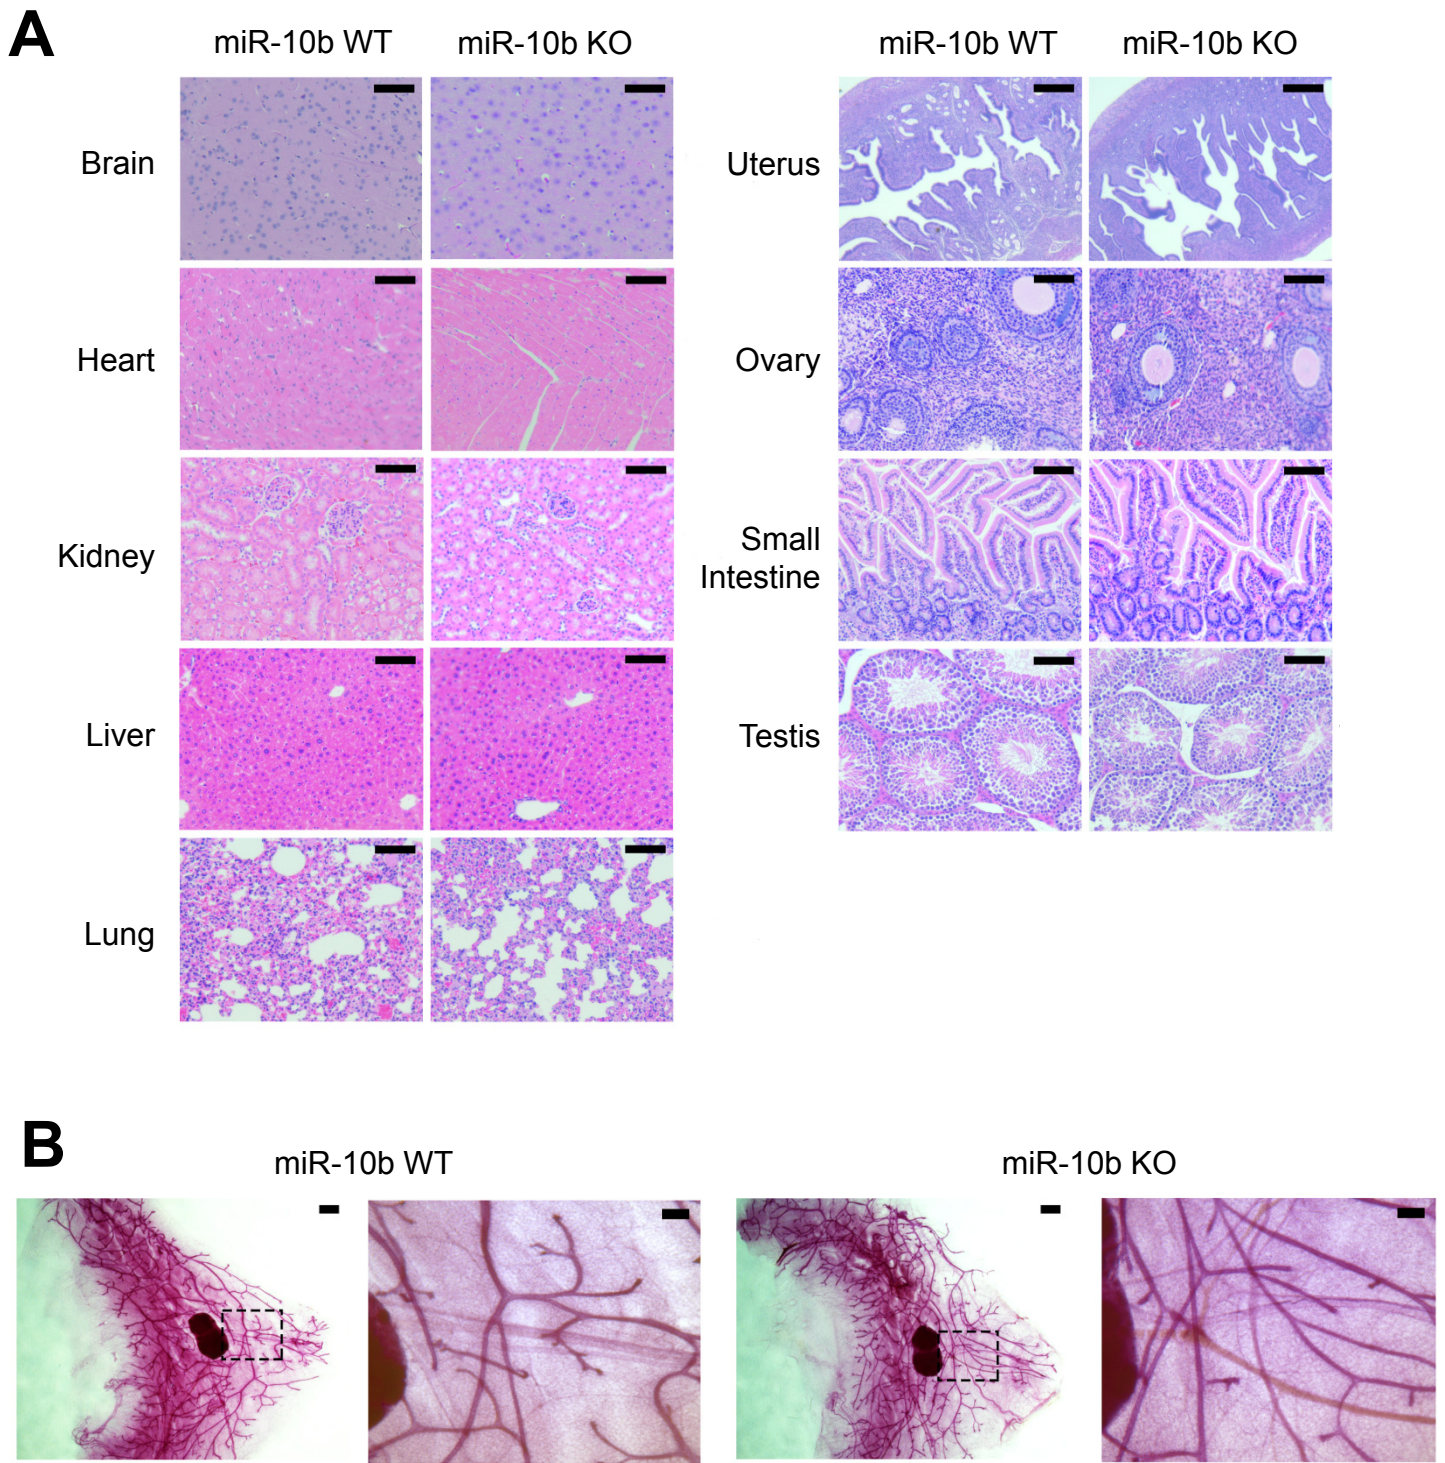

Supplementary Figure S6

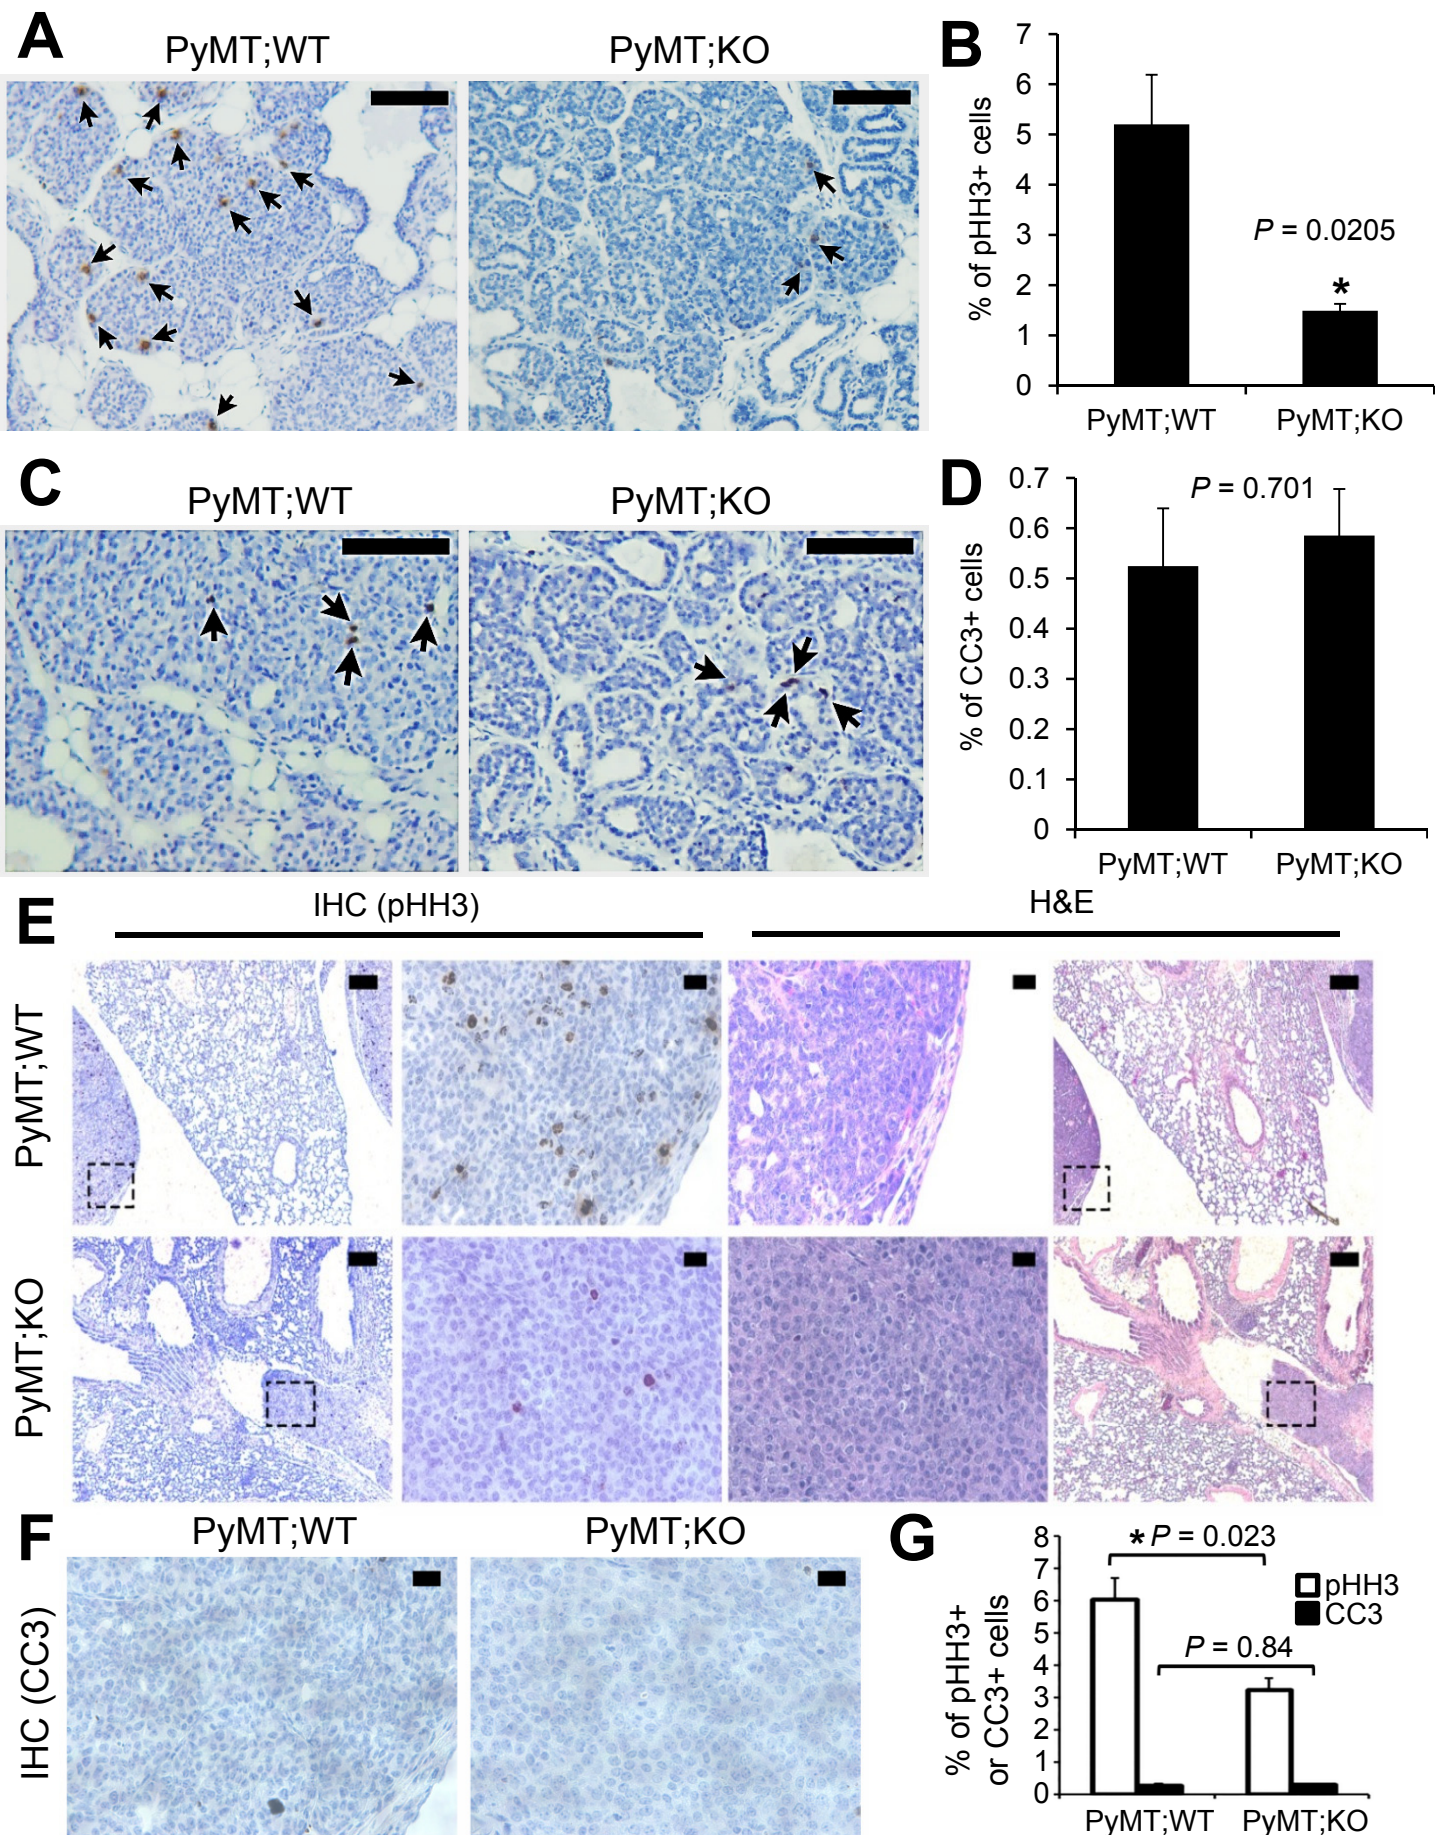

Supplementary Figure S7

PyMT IHC (×25)

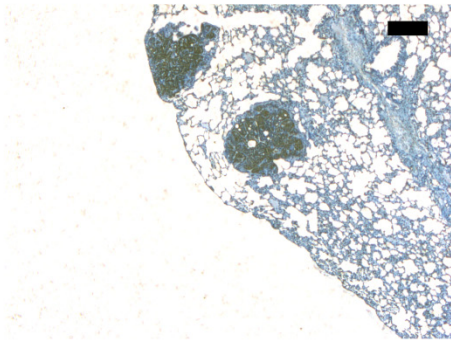

H&E (×25)

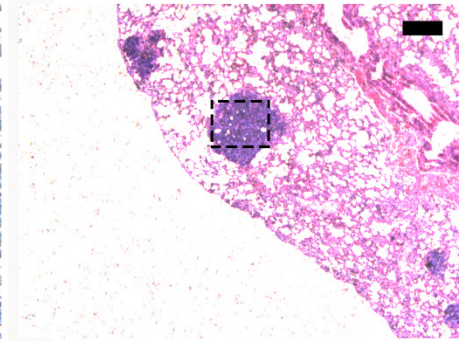

H&E (×200)

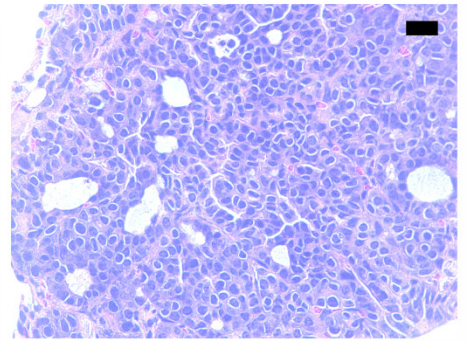

Supplementary Figure S8

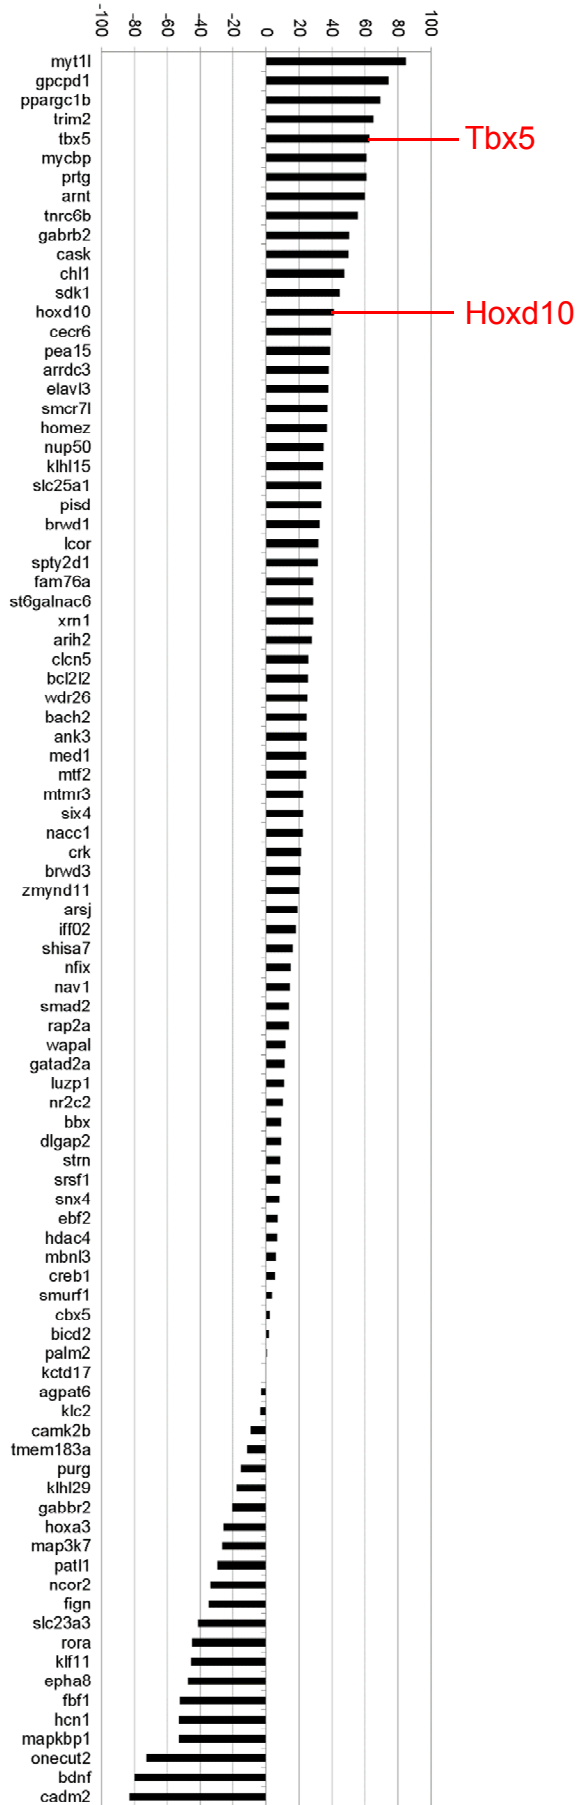



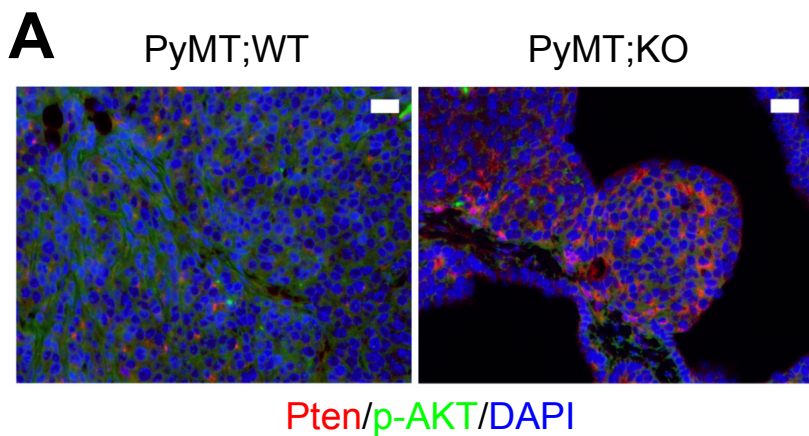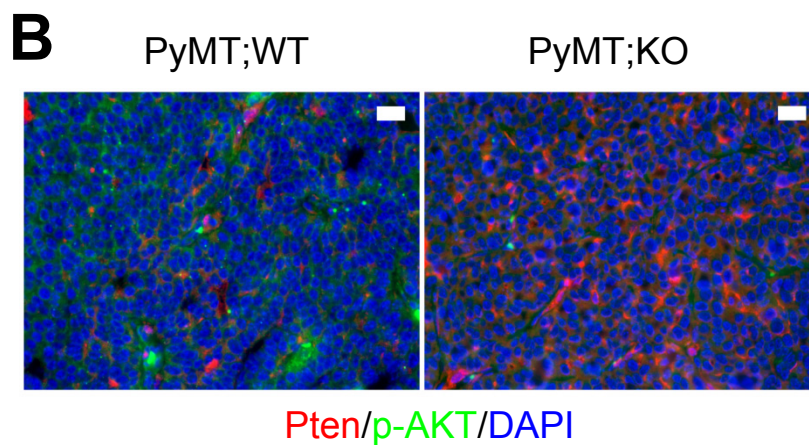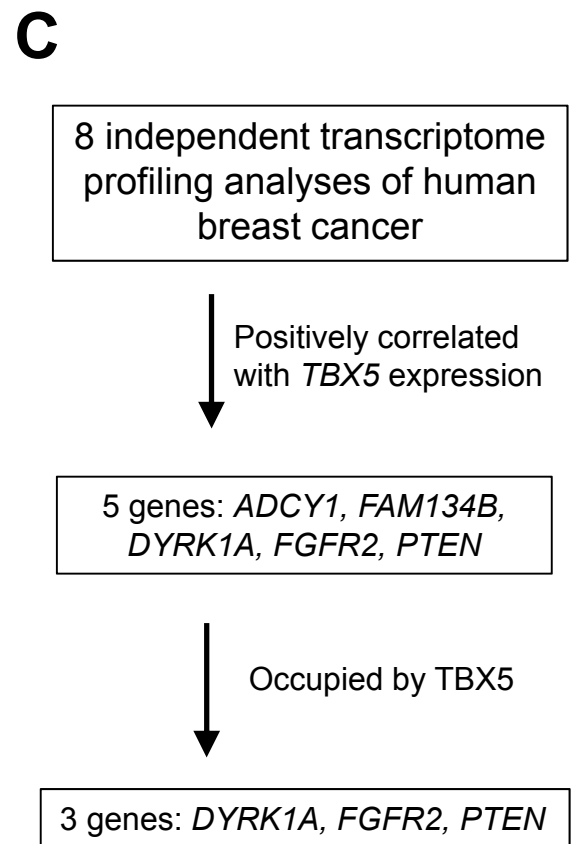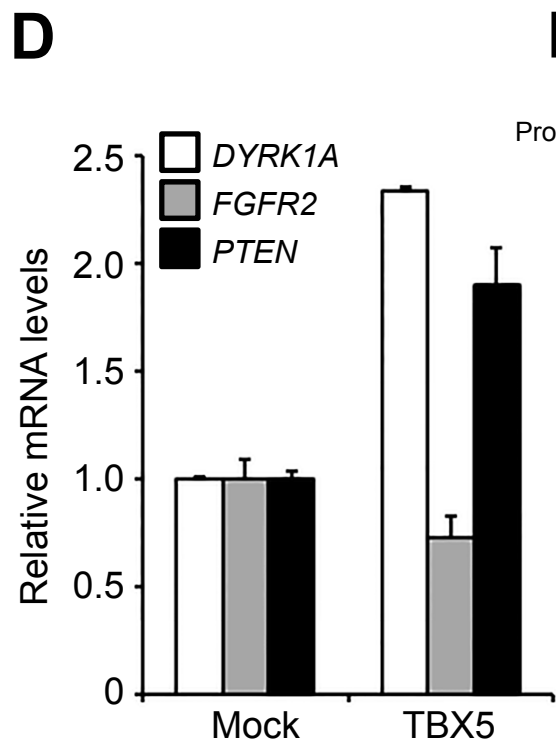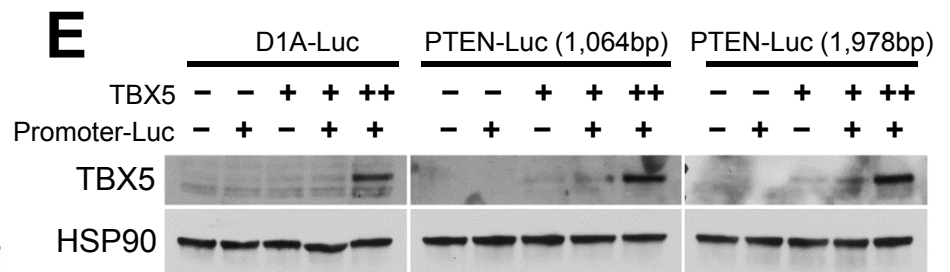

Sources of the 8 datasets used in Panel C:

- Lancet. 2003 Aug 2;362(9381):362-9.
- Nat Med. 2005 May;11(5):481-3.
- J Biol Chem. 2009 Jul 24;284(30):20408-17.
- J Biol Chem. 2006 May 26;281(21):14563-72.
- J Clin Oncol. 2010 Sep 20;28(27):4111-9.
- Cancer Res. 2008 Jul 1;68(13):5405-13.
- Breast Cancer Res Treat. 2012 Apr;132(3):1049-62.
- J Pathol. 2010 Aug;221(4):452-61.

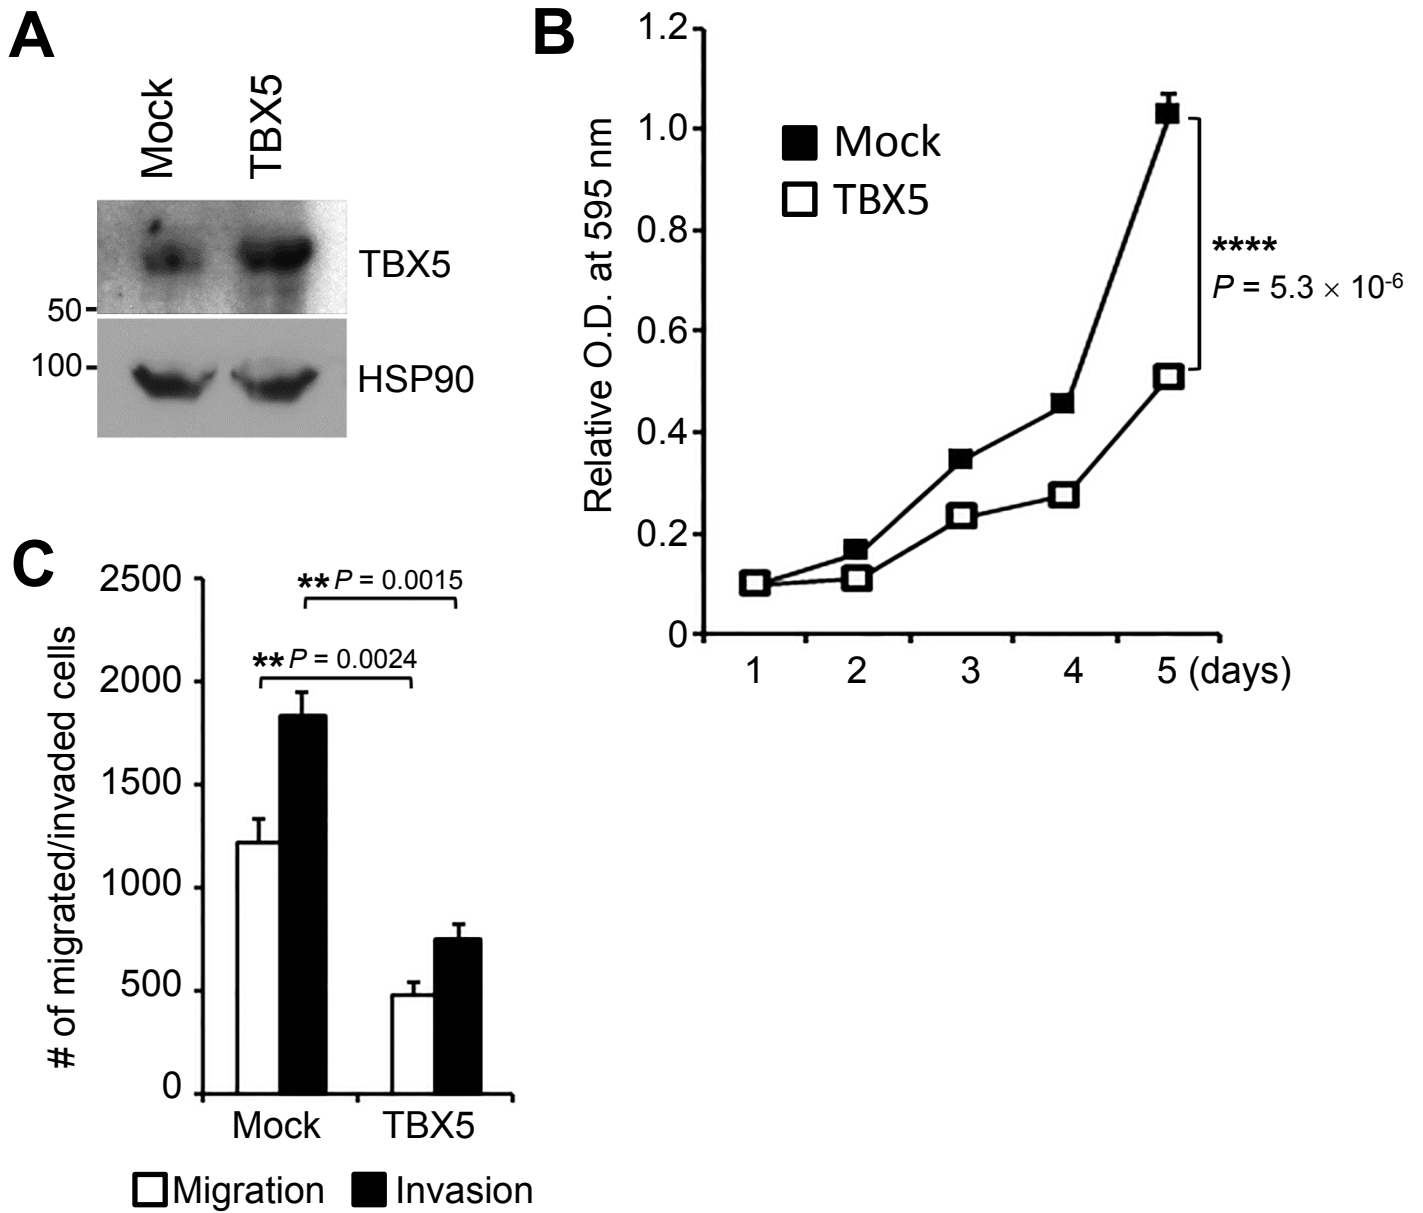

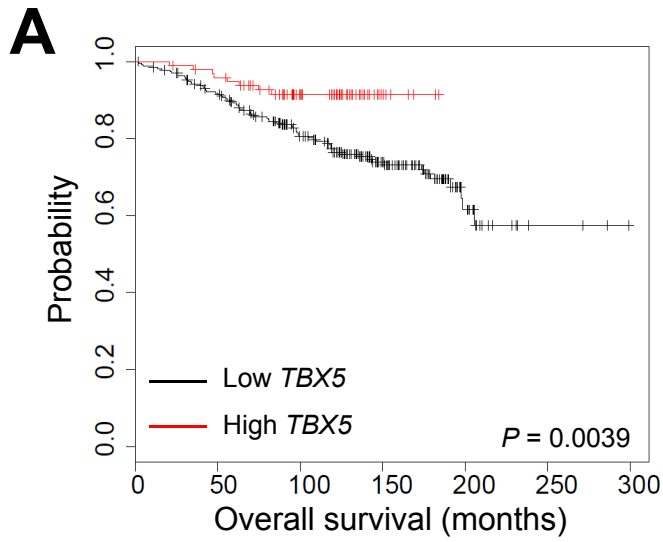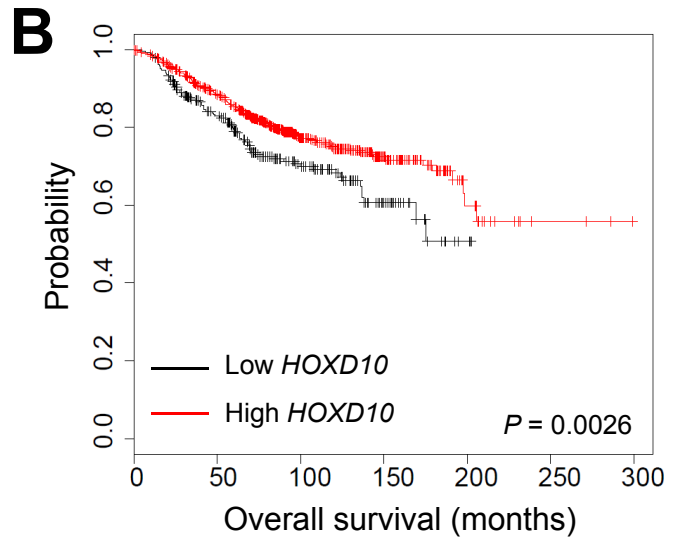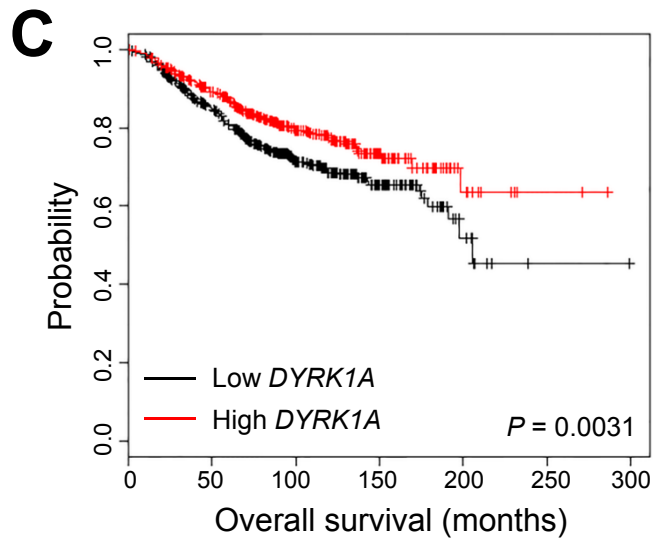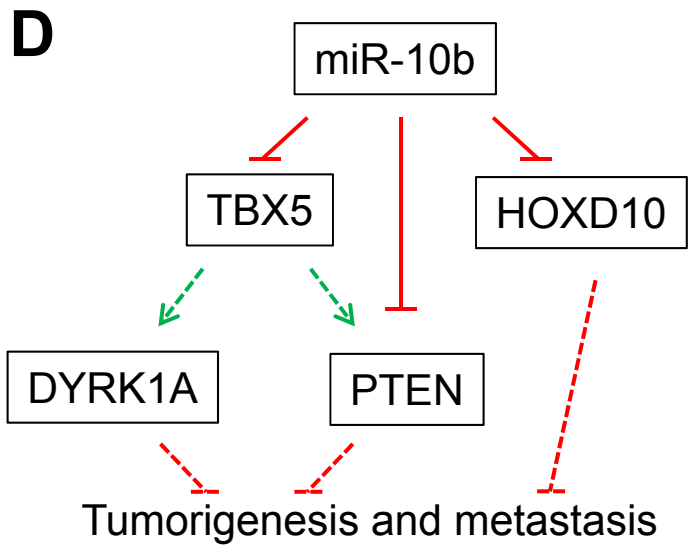

Supplement: NIHMS813693-supplement-3.pdf [file NIHMS813693-supplement-3.pdf]
